# Supplementary material for: Worse outcome in breast cancer with higher tumor-infiltrating FOXP3+ Tregs : a systematic review and meta-analysis
Source: Springer Nature journal article supplement (doi:10.1186/s12885-016-2732-0), 2016-08-26
Supplement: MOESM2 [file 10624700]

**A**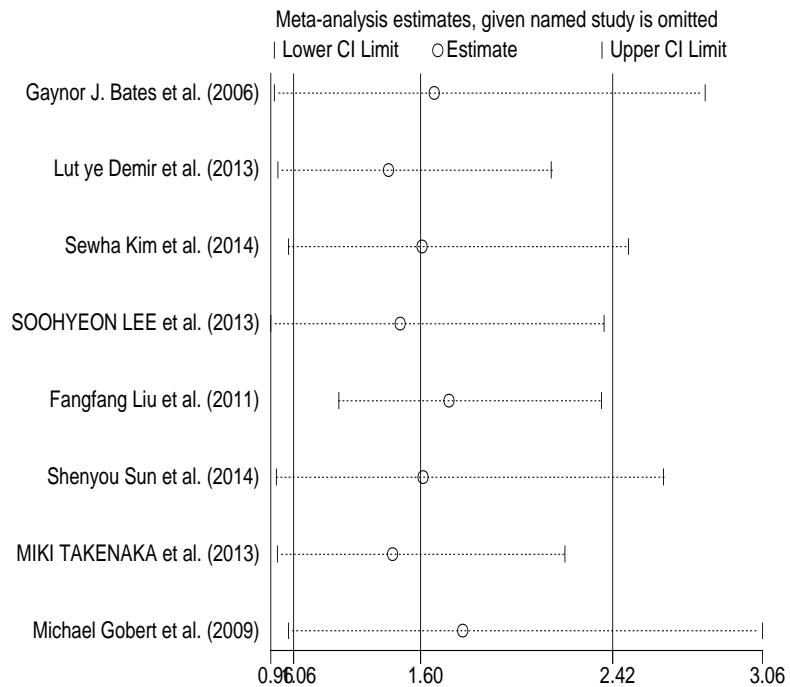**B**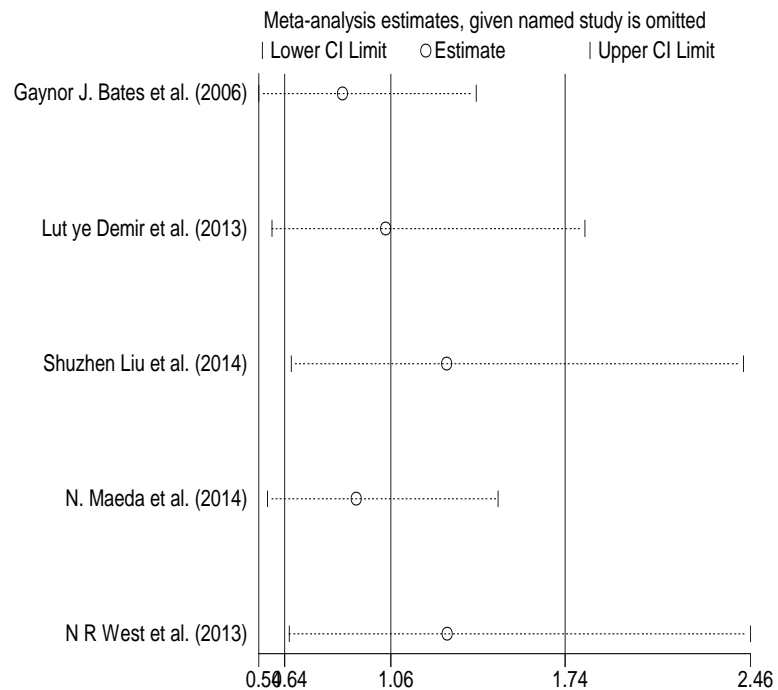

Figure S1: Sensitivity analysis of OS(A) and RFS(B).

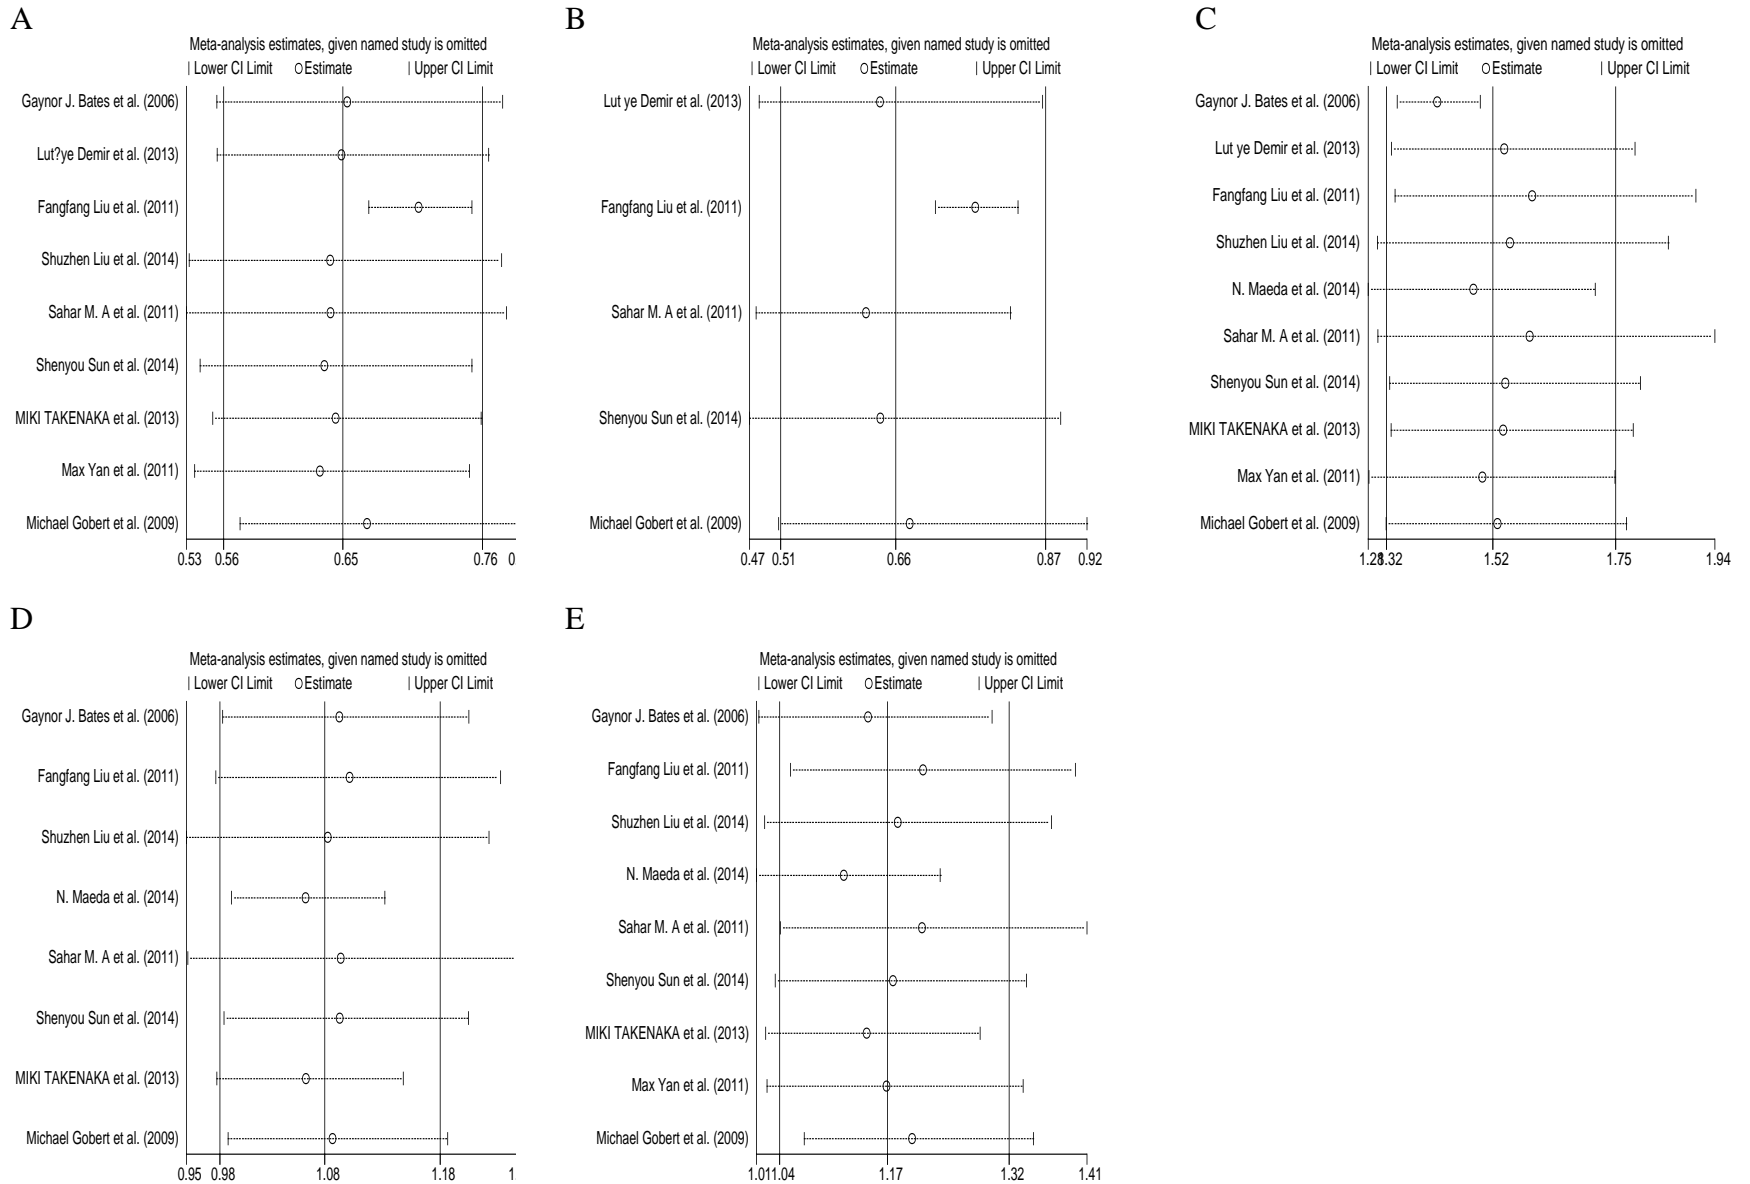

Figure S2: Sensitivity analysis of ER status(A) , PR status(B), c-erbB-2 status(C), T category(D) and N category(E).
